# Supplementary material for: Recycling Rusty Iron with Natural Zeolite Heulandite to Create a Unique Nanocatalyst for Green Hydrogen Production
Source: MDPI journal article supplement (doi:10.3390/nano11123445), 2021-12-20
Supplement: s1 [file s1]

## Supplementary Materials

# Recycling Rusty Iron with Natural Zeolite Heulandite to Create a Unique Nanocatalyst for Green Hydrogen Production

Mohamed Shaban <sup>1,2,\*</sup>, Mohammad BinSabt <sup>3</sup>, Ashour M. Ahmed <sup>2</sup> and Fatma Mohamed <sup>2,4</sup>

<sup>1</sup> Department of Physics, Faculty of Science, Islamic University in Madinah, Al-Madinah Al-Munawarah 42351, Saudi Arabia

<sup>2</sup> Nanophotonics and Applications (NPA) Lab, Physics Department, Faculty of Science, Beni-Suef University, Beni-Suef 62514, Egypt; ashour.elshemey@gmail.com (A.M.A.); f\_chem2010@yahoo.com (F.M.)

<sup>3</sup> Chemistry Department, Faculty of Science, Kuwait University, P.O. Box 5969, Safat 13060, Kuwait; Mohammad.binsabt@ku.edu.kw

<sup>4</sup> Polymer Research Laboratory, Chemistry Department, Faculty of Science, Beni-Suef University, Beni-Suef 62514, Egypt; f\_chem2010@yahoo.com

\* Correspondence: mssfadel@aucegypt.edu

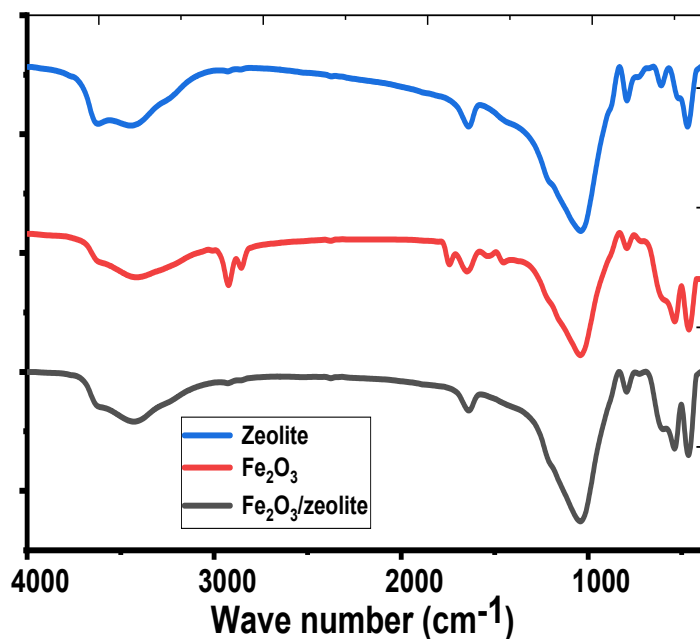

Figure S1. FT-IR spectra of Fe<sub>2</sub>O<sub>3</sub>, zeolite, and Fe<sub>2</sub>O<sub>3</sub>/zeolite nanocomposite.

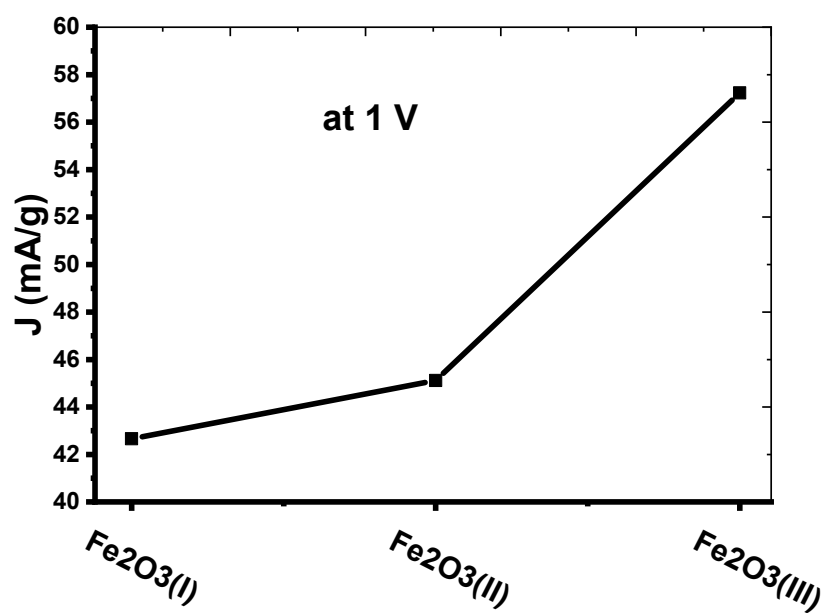

**Figure S2.** Variation of current density (J) for Fe<sub>2</sub>O<sub>3</sub> (I), (II), and (III) under white light illumination and at 1 V

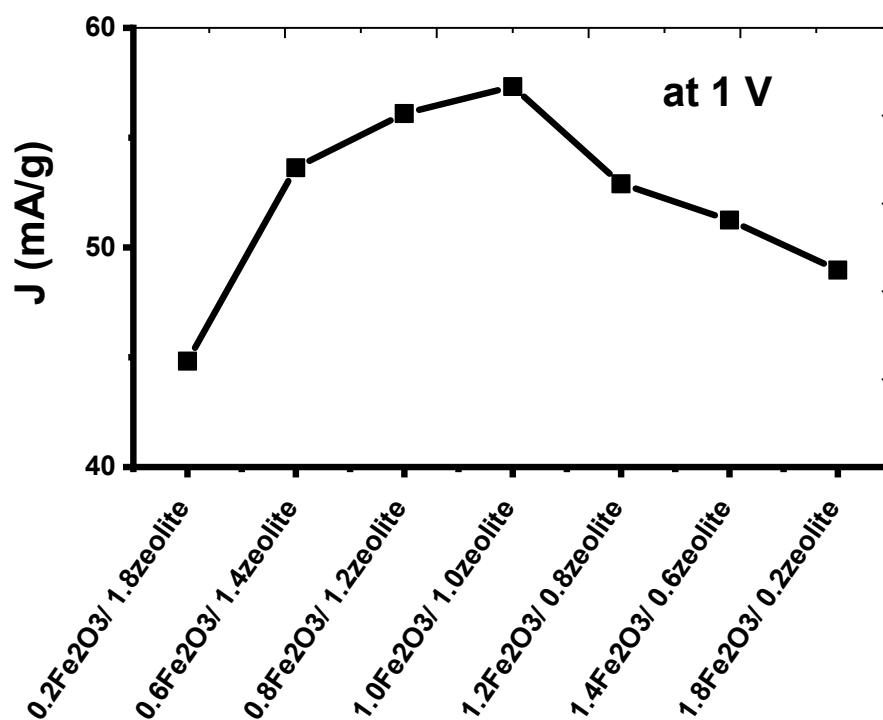

**Figure S3.** Variation of current density (J) for Fe<sub>2</sub>O<sub>3</sub> (III)/zeolite photoelectrodes with different Fe<sub>2</sub>O<sub>3</sub> (III)/zeolite weight ratios at 1 V under white light illumination
